# Supplementary material
Source: publisher site journal article supplement (https://www.dovepress.com/get_supplementary_file.php?f=269421.docx)
Supplement: Supplementary file 1 [file get_supplementary_file.php]

**Supplementary File**

**Wastage rate and stock outs days of program commodities of Central EPSA, April 2019**

*Table 1:Wastage rate and stock out days of HIV/AIDS commodities of central EPSA, April 2019*

| **Lists of products** | Frequency of stock out in ( 2017/8) | Total number of days stocked out(2017/8) | Total value of product managed in  2017/8 | total value of damaged plus expired products | % of value expired to total value of wasted due to expiration and damage | % value of product Wasted due to Expiration and Damage to value of total inventory(2017/8) |
| --- | --- | --- | --- | --- | --- | --- |
| ABC 300mg tab | 2 | 12 | 95885926.40 | 16476 | 100 | 0.017 |
| Atazinavir/r300mg+100mg tab | 1 | 15 | 76662442.97 | 591534.15 | 100 | 0.77 |
| Efavirenze 200mg capsule | 1 | 9 | 3260811.76 | 0 | - | 0 |
| Efavirence 50mg capsule | 1 | 7 | 1753780.02 | 18440.25 | 100 | 1.05 |
| Efavirence 600mg tab | 1 | 10 | 58115629.32 | 13723.08 | 100 | 0.024 |
| Lamivudine(3TC) 150mg tab | 1 | 6 | 2038290.80 | 324105.6 | 100 | 15.9 |
| 3TC +EFV + TDF  (300+600+300)mg tab | 1 | 14 | 605958944.50 | 169928.5 | 0 | 0.028 |
| 3TC + NVP + AZT (150  +200+ 300)mg tab | 1 | 20 | 143197999.84 | 0 | - | 0 |
| 3TC + NVP + AZT (30 +50+  60)mg tab | 1 | 0 | 89786856.06 | 72190.62 | 9.02 | 0.08 |
| 3TC + TDF (300mg+300mg)  tab | 1 | 4 | 62531765.80 | 13764.8 | 100 | 0.02 |
| 3TC + AZT (150 +300)mg tab | 0 | 0 | 142813839.28 | 348266 | 100 | 0.24 |
| 3TC + AZT (30 +60)mg tab | 1 | 35 | 7531762.00 | 2694.16 | 100 | 0.04 |
| 3TC + ABC (30 +60)mg tab | 1 | 8 | 3053058.56 | 0 | - | 0 |
| LPV + RTV( 100 + 25)mg tab | 1 | 21 | 1456744.48 | 0 | - | 0 |
| LPV + RTV(200 + 50)mg tab | 1 | 3 | 37851075.36 | 2260641.6 | 100 | 5.97 |
| NVP 10mg/ml, oral  suspension | 1 | 33 | 10905251.84 | 3418992.64 | 100 | 31.35 |
| NVP 200 mg tab | 1 | 10 | 55060945.83 | 1894.8 | 100 | 0.003 |
| Total |  | 207  days | 1397865125  ETB | 7252652.2  ETB |  | Wastage  0.52% |

Table 2:Wastage rate and stock out days of MCH commodities of central EPSA, April 2019

| PRODDUCTS | Number of stock out in 2017/8/ | Total number of days stocked out(2017/8) | Total value of product managed in 2017/8 | total value of damaged plus expired products | %of value expired to total value damaged and expired | % value of product Wasted due to expiration and damage to total inventory value (2017/8) |
| --- | --- | --- | --- | --- | --- | --- |
| Condom Male | 0 | 0 | 25520544 | 144.9 | 0 | 0.00057 |
| Condoms (Female) | 0 | 0 | 138109.5 | 0 | - | 0 |
| Etonogestrel-68mg  Capsule(Sub-Implant) | 1 | 10 | 89915037.6  3 | 447.54 | 66.7 | 0.00049 |
| IUCD-Long acting | 1 | 36 | 3720515.35 | 0 | - | 0 |
| Levonorgestrel - 75 mg/rod  of 2rods - implant rods  with sterile insertion trocar | 0 | 0 | 841214047.  2 | 0 | - | 0 |
| Levonorgestrel 0.03mg tab | 1 | 7 | 2973850.42 | 11967.28 | 100 | 0.4 |
| Levonorgestrel - 0.75mg –  tab | 2 | 12 | 2331076.32 | 27.675 | 0 | 0.001 |
| Levonorgestrel  +Ethinylestradiol + Ferrous  Fumerate(0.15 + 0.03 +75  )mg - tab | 1 | 5 | 20161338.0  5 | 4425.19 | 45.45 | 0.022 |
| Medroxyprogesterone  Acetate - 150mg/ml in 1ml vial - Injection with 3ml Syringe | 0 | 0 | 139593680.  83 | 9493827.  79 | 99.98 | 6.8 |
| Mifepristone + Misoprostol  - (200mg (1Tablet) +  200mcg (4 Tablets)) – tab | 0 | 0 | 669461868 | 9045222.  21 | 99.76 | 1.35 |
| Misoprostol - 200mcg –  Tablet | 0 | 0 | 10667481.7  4 | 1137481.  74 | 99.80 | 10.66 |
| Misoprostol 25mcg Tablet | 0 | 0 | 5815206 | 0 | - | 0 |
| Total |  | 70 | 1811512755  ETB | 1969354  4.33  ETB |  | Wastage  rate  1.09% |

Table 3:Wastage rate and stock out days of malaria commodities of central EPSA, April 2019

| PRODDUCTS | Number of stock out in 2017/8 | Total number of days stocked out(2017/8 | Total value of product managed in  2017/8 | total value of damaged plus expired | % value of expire to total value of damage and expired | % value of product Wasted  due to Expiration and damage to total inventory value(2017/8) |
| --- | --- | --- | --- | --- | --- | --- |
| Artemether+ Lumefanthrine  (20mg+120mg) tab (6x1) | 1 | 26 | 99123413.5 | 290140  52.88 | 99.4 | 29.27 |
| Artemether+ Lumefanthrine  (20mg+120mg) tab(6x2) | 1 | 10 | 28781452.7 | 403718  8.40 | 98.5  4 | 14.03 |
| Artemether+ Lumefanthrine  (20mg+120mg) Tablet  (6x3) | 1 | 8 | 10150986.9 | 303593  7.30 | 100 | 29.91 |
| Artemether + lumefantrine  (20 +120)mg 6x4 tablet | 0 | 0 | 28126984.6  4 | 142061  1.36 | 99.9  4 | 5.05 |
| Artesunate - 60mg - Vial –  Injection | 1 | 4 | 5614267.41 | 3360.4  2 | 0 | 0.06 |
| chloroquine Phosphate -  50mg – syrup | 1 | 10 | 800604.54 | 47881.  44 | 99.4  6 | 5.98 |
| primaquine 7.5mg tablet | 0 | 0 | 37612364.9  8 | 0 | - | 0 |
| Chloroquine Phosphate -  150mg – Tablet | 0 | 0 | 9970389.63 | 63899.  28 | 97.8  1 | 0.64 |
| Quinine Sulfate -300mg –  Tablet | 0 | 0 | 5414400 | 0 | - | 0 |
| Rapid Diagnostic Test  (Malaria AGPF/PV) | 0 | 0 | 66862763.2  8 | 913560  .06 | 99.5  8 | 1.37 |
| Total |  | 58 | 292,457,627.  6ETB | 385364  91.1  4ETB |  | Wastage  rate  13.18% |

Table 4:Wastage rate and stockout days of TB commodities of central EPSA, April 2019

| PRODDUCTS | Number of stock out 2017/8 | Total number of days stocked out  (2017/8) | Total value of product managed in  2017/8 | total value of damaged plus expired products | % value of expired to total value of product wasted due expiration and damage | %value of product wasted due to expiration and damage to total inventory value (2017/8) |
| --- | --- | --- | --- | --- | --- | --- |
| INH300mg –Tab | 0 | 0 | 2259758  1.8 | 641.84 | 0 | 0.003 |
| RHZE(150mg+75mg+400mg  +275mg) of 6x28 tab + (150mg+75mg)of 12x28 tab – tab | 0 | 0 | 7082470  4.2 | 115621.  76 | 26.10 | 0.16 |
| Pyridoxine HCL (Vitamin  B6) - 25 mg - Tablet | 0 | 0 | 8075816  1 | 0 | - | 0 |
| Ethambutol - 400mg – Tablet | 0 | 0 | 246768.3  4 | 36112.4  4 | 1.19 | 14.63 |
| Ethambutol - 100mg – Tablet | 0 | 0 | 5533234.  8 | 0 | - | 0 |
| Isoniazid -(INH) 100 mg –  Tablet | 0 | 0 | 5875359.  42 | 91.56 | 25 | 0.002 |
| RH(75mg+50mg) – Tablet | 0 | 0 | 4667936 | 0 | - | 0 |
| RHZ(75mg+50mg+150mg) –  Tab | 0 | 0 | 1862545 | 0 | - | 0 |
| Amino salicylic Acid Delayed  release granule, 4gms –  Solution | 1 | 45 | 2875072.  72 | 1239034  .68 | 96.39 | 43.1 |
| Amoxicillin + Clavulanic  Acid - (500mg+125mg) - tab  (Film Coated) | 0 | 0 | 393204.4  2 | 40491 | 97.82 | 10.3 |
| Capreomycin - 1g in vial -  Powder for injection | 1 | 14 | 7523733  8 | 1175561  .18 | 99.89 | 1.56 |
| Cycloserine-250mg-capsule | 1 | 5 | 1957440  6.9 | 9000520  .29 | 98.38 | 45.98 |
| Kanamycin Sulfate - 1gm/4ml  – Injection | 1 | 5 | 3257224.  82 | 31886.3  9 | 94.34 | 0.98 |

| Levofloxacin 250mg –tab | 0 | 0 | 2928913.  4 | 9746.8 | 0 | 0.33 |
| --- | --- | --- | --- | --- | --- | --- |
| Moxifloxacin-400mg-tablet | 1 | 47 | 2220082.  26 | 940265.  7 | 100 | 42.35 |
| Prothionamide-250mg- tab | 1 | 24 | 6846273.  7 | 361.3 | 0 | 0.01 |
| Pyrazinamide- 400g-Tablet | 1 | 17 | 2621198.  7 | 520948.  8 | 99.93 | 19.87 |
| Bedaquiline -100mg-Tablet | 1 | 46 | 1562520 | 0 | - | 0 |
| Linezolid- 600mg- Tablet | 1 | 4 | 5860624 | 0 | - | 0 |
| Clofazimine – 100mg- Tablet | 1 | 8 | 1300206.  4 | 0 | - | 0 |
| Clofazimine – 50mg- Tablet | 0 | 0 | 75489.28 | 0 | - | 0 |
| Delamanid – 50mg – Tablet | 1 | 45 | 10440 | 0 | - | 0 |
| Auramine – O 50mg | 0 | 0 | 271300 | 0 | - | 0 |
| Auramine – O 1000mg | 0 | 0 | 14944 | 0 | - | 0 |
| Basic fuchsine – crystal 25gm | 0 | 0 | 215878 | 0 | - | 0 |
| Ethanol - 96% RL 1000ml | 0 | 0 | 707534.7  3 | 6647.34 | 0 | 0.94 |
| Hydrochloric Acid -  Concentrated 37% | 0 | 0 | 24199.96 | 0 | - | 0 |
| Immersion oil 100ml | 0 | 0 | 476664.1  6 | 0 | - | 0 |
| Methylene Blue - powder 25g | 0 | 0 | 190074 | 0 | - | 0 |
| Phenol – Crystal 500mg | 0 | 0 | 411056.9  0 | 0 | - | 0 |
| Phenol – Crystal 1000mg | 0 | 0 | 120646.6  8 | 0 | - | 0 |
| Total |  | 260 |  |  |  | Wastage  rate |
| Value |  |  | 3195615  84.1ETB | 1311793  1ETB |  | 4.1% |
